# Supplementary material for: Impact of intracoronary nicorandil before stent deployment in patients with acute coronary syndrome undergoing percutaneous coronary intervention
Source: PubMed Central journal article supplement — Exp Ther Med. 2019 Nov 19;19(1):137–46. doi: 10.3892/etm.2019.8219 (PMC6909796; doi:10.3892/etm.2019.8219), 2019-11-19

Figure S1. Flow diagram of the progression through the phases of this trial. ACS, acute coronary syndrome; PCI, percutaneous coronary intervention.

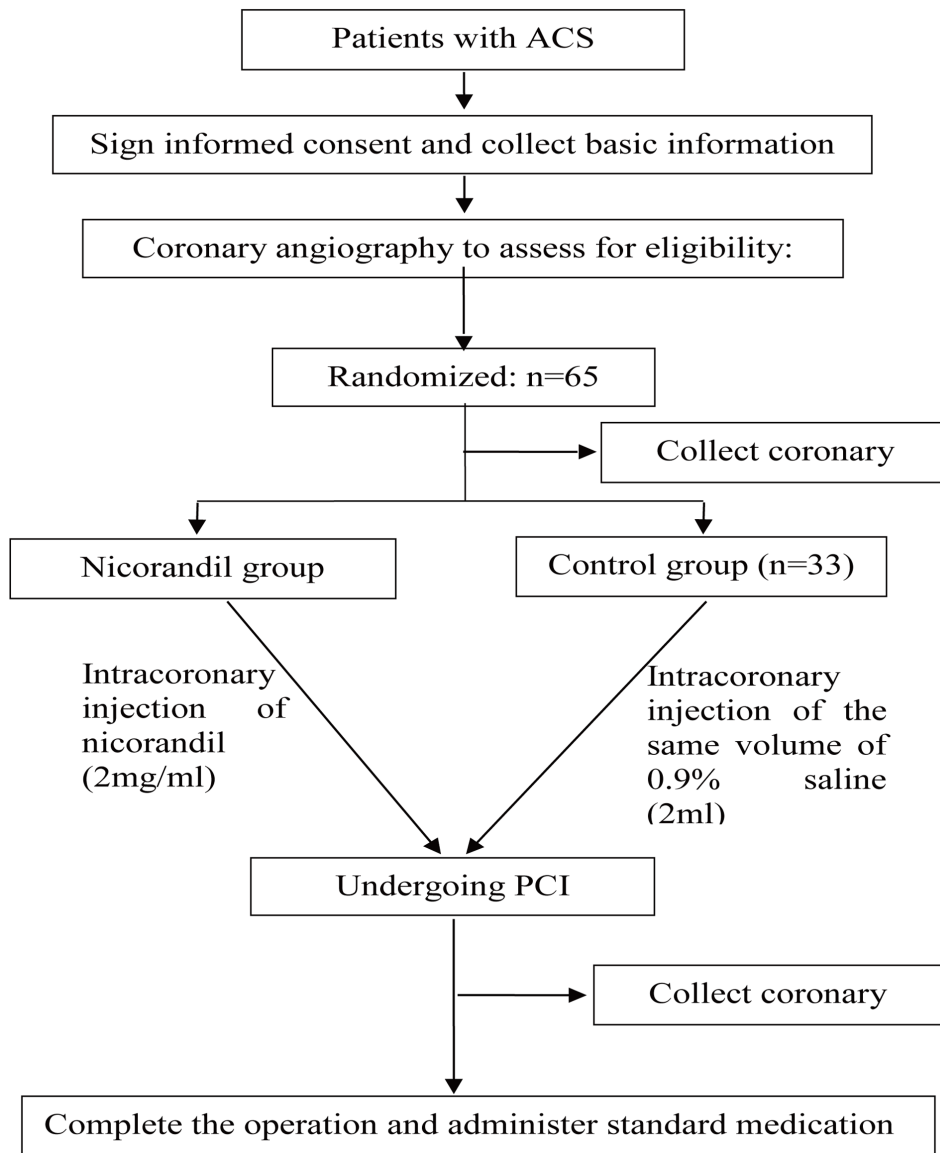

Supplement: Supplementary_Data.pdf [file Supplementary_Data.pdf]
